# Supplementary material for: Antimicrobial Activity of Chamomile Essential Oil: Effect of Different Formulations
Source: PubMed Central journal article supplement (PMC6930572; doi:10.3390/molecules24234321), 2019-11-26
Supplement: molecules-24-04321-s001.pdf [file molecules-24-04321-s001.pdf]

# Antimicrobial activity of chamomile essential oil: Effect of different formulations

## Supplementary Material

**Table S1.** Results of GC-MS analysis of chamomile EO. In the table the major components can be seen, the compounds that were present significantly under 1% was not indicated or identified.

| No. | Compound                   | tr (min) | Area percentage (%) |
|-----|----------------------------|----------|---------------------|
| 1   | trans $\beta$ -Farnesene   | 23.304   | 17.93               |
| 2   | Germacrene D               | 23.971   | 1.54                |
| 3   | bicyclogermacrene          | 24.526   | 1.39                |
| 4   | (E,E)- $\alpha$ -Farnesene | 25.100   | 2.08                |
| 5   | spathulenol                | 27.676   | 1.88                |
| 6   | Bisabolol oxide B          | 30.732   | 7.57                |
| 7   | Bisabolone                 | 32.133   | 21.83               |
| 8.  | Chamazulen                 | 33.375   | 3.19                |
| 9.  | Bisabolol oxide A          | 34.127   | 10.48               |
| 10. | Vetivazulene               | 35.048   | 4.94                |

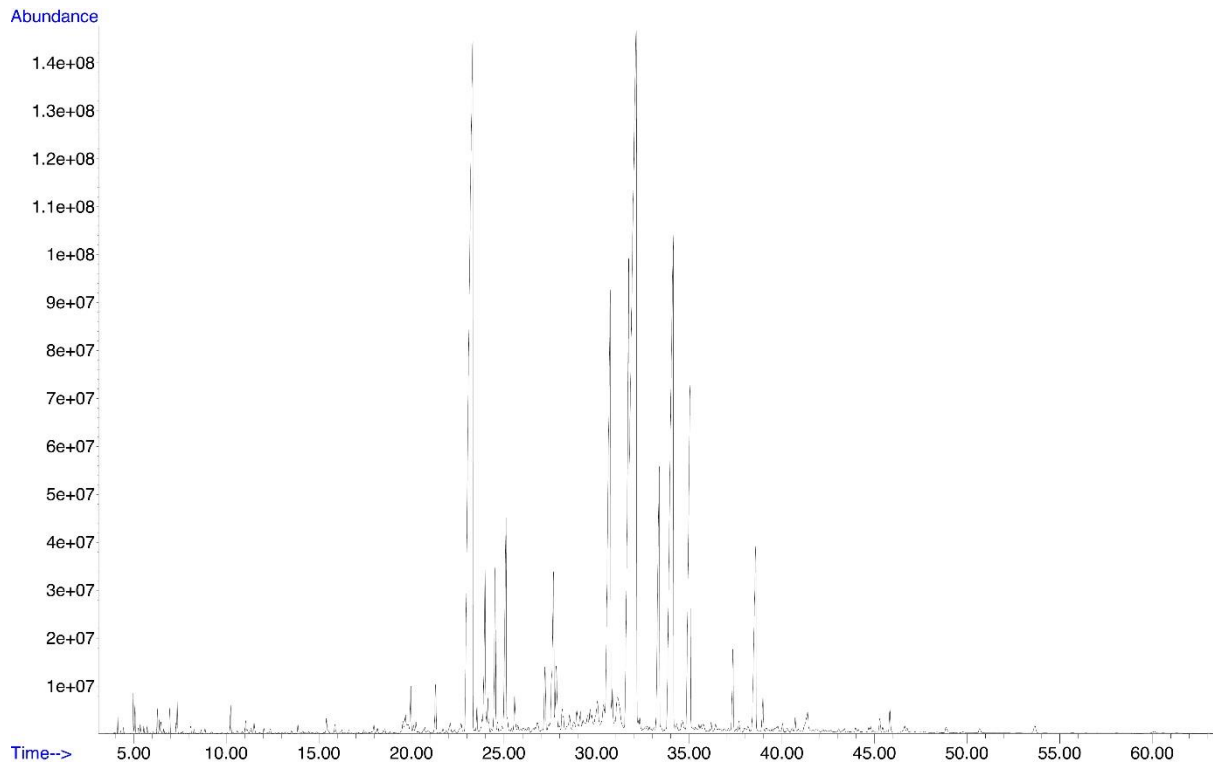

**Figure S1.** Chromatogram of chamomile essential oil obtained by GC/MS.
